# Supplementary material
Source: publisher site journal article supplement (https://www.dovepress.com/article/339876)
Supplement: Supplementary file 1 [file get_supplementary_file.php]

**APPENDIX**

**INFORMED CONSENT**

I have read or obtained a clear explanation, am fully aware of and understand the objectives, benefits, and risks that may arise in the research, and have been given the opportunity to ask questions and have them answered satisfactorily. I may withdraw and discontinue participation at any time without penalty. My participation in this project is voluntary. I understand that I will not be paid for my participation. I understand that my data will be kept confidentially and only be used for research.

Then, I

r Agree

r Disagree

to participate in this research, entitled:

“**PARENTS’ KNOWLEDGE, ATTITUDE, AND PRACTICE ON CHILDHOOD VACCINATION DURING THE COVID-19 PANDEMIC IN INDONESIA”**

I have been given a copy of this consent form.

| **Date:** |
| --- |
| **Full name:** |
| **Phone/e-mail:** |

For further information, please contact:

Rano K. Sinuraya ([r.k.sinuraya@unpad.ac.id](mailto:r.k.sinuraya@unpad.ac.id))

Auliya A. Suwantika ([auliya@unpad.ac.id](mailto:auliya@unpad.ac.id))

**SUBMIT**

The information described below provides the questionnaire used in this study.

[Backgrounds]

| Name | : |  |
| --- | --- | --- |
| Gender | : | ( ) Male ( ) Female |
| Age | : | ……… years old |
| Occupation | : | ( ) Employed ( ) Unemployed |
| Education | : | ( ) Senior High School ( ) University |
| Address | : |  |
| Right now, do you have a child in kindergarten or primary school? | : | ( ) Yes ( ) No |

[Knowledge]

| Questions | Your response |
| --- | --- |
| Is vaccination important for children from the first day of birth? | ( ) Yes ( ) No |
| Does vaccination prevent infectious disease? | ( ) Yes ( ) No |
| Could vaccination decrease the rates of mortality and disability? | ( ) Yes ( ) No |
| Could vaccination maintain child health? | ( ) Yes ( ) No |
| Could vaccination control diphtheria, tetanus, and pertussis? | ( ) Yes ( ) No |
| Could vaccination prevent coronavirus? | ( ) Yes ( ) No |
| Could childhood vaccines control measles? | ( ) Yes ( ) No |
| Are fever and pain associated with vaccines? | ( ) Yes ( ) No |
| Could convulsions and skin rush result from vaccination? | ( ) Yes ( ) No |

[Attitudes]

| Questions | Your response |
| --- | --- |
| Are vaccinations beneficial for your child? | ( ) Yes ( ) No |
| Are vaccinations safe for children? | ( ) Yes ( ) No |
| Do you agree with the NIP as one of the Ministry of Health’s programs? | ( ) Yes ( ) No |
| Would you recommend friends and families to vaccinate their children, including the /COVID-19 vaccine? | ( ) Yes ( ) No |

[Practices]

| Questions | Your response |
| --- | --- |
| Did your child participate in the previous NIP? | ( ) Yes ( ) No |
| Apart from the vaccines that the government requires, are you considering giving your child other vaccines, such as pneumonia, diarrhea, or COVID-19 vaccines, if they are available? | ( ) Yes ( ) No |
| If your child has swelling due to vaccine, will you apply cold compress? | ( ) Yes ( ) No |
| Would you use pain relievers (analgesics) to treat swelling and pain after vaccination? | ( ) Yes ( ) No |
| During the COVID-19 pandemic, has your child been vaccinated? | ( ) Yes ( ) No |
